# Supplementary material for: Ontology-Based Meta-Analysis of Global Collections of High-Throughput Public Data
Source: PLoS One. 2010 Sep 29;5(9):e13066. doi: 10.1371/journal.pone.0013066 (PMC2947508; doi:10.1371/journal.pone.0013066)
Supplement: Table S2 — Meta-analysis results for the brown fat tissue signature query against all other public datasets on normal tissue analysis. (0.02 MB XLS) [file pone.0013066.s002.xls]

## Sheet: bioset_studies
Gene expression Signature: "Brown fat - gene expression relative to all other body tissues"
Study: GNF Body Atlas Mm: Relative gene expression
Correlation results with normal tissue and disease signatures
Normal tissues	Normal tissue score	Correlation	Disease name	Diseases score	Correlation
Skeletal muscle tissue	100	+	Quadriplegia	100	-
Tongue	93.7229	+	Duchenne muscular dystrophy	91.4246	-
Epidermis	93.2359	+	Effects of low temperature	89.4859	+
Cardiac atrium	88.928	+	Oral Cancer	87.8905	-
Duodenum	85.8933	+	Osteitis fibrosa cystica	86.4275	n/a
Nucleus of brain	85.3005	+	Fetal malnutrition	86.3638	-
Digastric	84.1396	n/a	Helicobacter-associated disease	85.4785	-
Triceps surae	83.9107	n/a	Cholangiocarcinoma of biliary tract	84.7623	-
Adipose tissue	83.8214	+	Obesity	84.7336	+
Quadriceps femoris	83.4429	+	Myocardial infarction	84.1271	-
Embryonic tissue	83.2533	n/a	Liver carcinoma	83.8938	-
Adipose tissue/White adipose tissue	82.7291	+	Aseptic necrosis of bone	83.2777	+
Nucleus of brain/Substantia nigra	82.0442	+	Aging	82.9197	-
Nucleus of brain/Central gray substance of midbrain	81.8411	n/a	Corneal burn	81.8453	+
Trigeminal ganglion	81.7097	+	Osteosarcoma of bone	81.6854	-
Set of lactiferous glands	81.5881	+	Diet	81.6522	-
Cavitated organ/Heart	81.5127	+	Complication of transplanted kidney	80.5513	-
Parenchymatous organ/Pituitary gland	81.4235	-	Complication of transplanted kidney/Delayed renal graft function	80.3714	-
Cardiac ventricle	80.639	+	Transitional cell carcinoma of kidney	80.2498	-
Parenchymatous organ/Adrenal gland	80.6205	+	Teratozoospermia	79.6697	+
Jejunum	80.2157	+	Diet/High fat diet	79.5111	-
Superior vena cava	80.0504	+	Diet/Caloric restriction diet	79.0248	+
Subdivision of nucleus of neuraxis	79.8732	+	Diet/Ketogenic diet	76.832	-
Deltoid	79.4147	+	Oral Cancer/Squamous cell carcinoma of tongue	68.8923	-
Cavitated organ/Stomach	79.4072	+	Trypanosomiasis/Chagas' disease	61.7925	n/a
Parenchymatous organ/Pancreas	78.2727	+	Diet/Fasting diet	57.6968	+
Subdivision of nucleus of neuraxis/Subdivision of globus pallidus	77.5325	+	Diet/Nutrient restriction diet	48.0897	n/a
Nucleus of brain/Subthalamic nucleus	77.4559	+
Subdivision of nucleus of neuraxis/Subdivision of substantia nigra	76.5101	+
Parenchymatous organ/Thyroid gland	76.2292	-
Adipose tissue/Subcutaneous adipose tissue	75.658	+
Nucleus of brain/Nucleus of stria terminalis	75.376	n/a
Parenchymatous organ/Liver	74.9995	+
Parenchymatous organ/Salivary gland	74.9742	+
Nucleus of brain/Putamen	73.0296	+
Nucleus of brain/Ventral tegmental area	72.5076	+
Nucleus of brain/Caudate nucleus	72.2086	+
Parenchymatous organ/Prostate	71.8417	n/a
Parenchymatous organ/Ovary	71.8302	n/a
Nucleus of brain/Globus pallidus	71.7388	+
Parenchymatous organ/Kidney	70.2358	+
n/a - direction could not be reliably determined
