# Supplementary material for: Ontology-Based Meta-Analysis of Global Collections of High-Throughput Public Data
Source: PLoS One. 2010 Sep 29;5(9):e13066. doi: 10.1371/journal.pone.0013066 (PMC2947508; doi:10.1371/journal.pone.0013066)
Supplement: Table S4 — Brown preadipocytes gene expression signature. The signature was identified by comparing cultured brown preadipocytes to white preadipocytes at day 4. (0.01 MB DOC) [file pone.0013066.s004.xls]

## Sheet: bioset_studies(1)
Gene expression Signature: "Brown preadipocytes culture 4d _vs_ white preadipocytes culture 4d"
Study: White versus brown adipocytes
Bioset feature size: 2302
Correlation results with normal tissue signatures
Normal tissue	Normal tissue score	Correlation
Schwann cell	100	-
Neural crest cell	99.9957	-
Cardiac atrium	92.5913	-
Embryonic tissue	90.2783	+
Muscle stem cell	89.9282	+
Hair matrix	88.3218	+
Mesenchymal cell	87.5501	-
Chondroblast	87.3658	-
Region of prostatic stroma	86.8213	-
Vasculature	85.2172	-
Metanephros	84.6486	n/a
Secondary nodular lymphoid tissue	83.6291	n/a
T-helper cell type 2	83.4814	+
Embryonic stem cell	83.3136	+
Ulna	82.9908	n/a
Embryonic tissue/Mesoderm	75.8902	+
Mesenchymal cell/Stromal cell of ovary	75.3896	-
Embryonic tissue/Endoderm	72.414	+
Embryonic tissue/Ectoderm	67.386	+
Vasculature/Vasculature of brain	64.1301	-
n/a - direction could not be reliably determined
