# Supplementary material for: Ontology-Based Meta-Analysis of Global Collections of High-Throughput Public Data
Source: PLoS One. 2010 Sep 29;5(9):e13066. doi: 10.1371/journal.pone.0013066 (PMC2947508; doi:10.1371/journal.pone.0013066)
Supplement: Table S5 — Meta-analysis results for the brown preadipocyte signature query against all other public datasets on normal tissue analysis. Brown preadipocyte signature was determined by comparing gene expression of cultured brown preadipocytes versus white preadipocytes at 4 days. (0.01 MB XLS) [file pone.0013066.s005.xls]

## Sheet: bioset_studies(1)
Gene expression signature: "Adipose tissue_mesenteric - relative gene expression"
Study: GNF Body Atlas Mm: Relative gene expression
Signature size: 31309 probesets
Correlation results with normal tissue signatures
Normal tissue	Normal tissue score	Correlation
Preoptic area	100	-
Mesenteric lymph node	96.8106	+
Substantia nigra	91.09	-
Dorsal striatum	88.5061	-
Synovial membrane	86.395	+
Synovial membrane/Synovial membrane of articular capsule of synovial joint	83.2371	+
Digits	84.7813	n/a
Epidermis	84.7354	+
Trachea	84.2101	+
Femur	84.0159	+
Pituitary gland	83.4653	-
Brown adipose tissue	82.7236	+
Adrenal gland	82.6445	+
Parietal lobe	81.3553	-
Zygote	80.823	-
Set of lactiferous glands	79.9935	+
Occipital lobe	79.6946	-
Caudate nucleus	79.6185	-
Cecum	79.2304	+
Vestibular nuclear complex	78.4935	-
Spinal cord	78.2933	-
n/a - direction could not be reliably determined
